# Supplementary material
Source: PubMed Central journal article supplement (PMC4631171)
Supplement: bcp0080-0979-sd1.pdf [file bcp0080-0979-sd1.pdf]

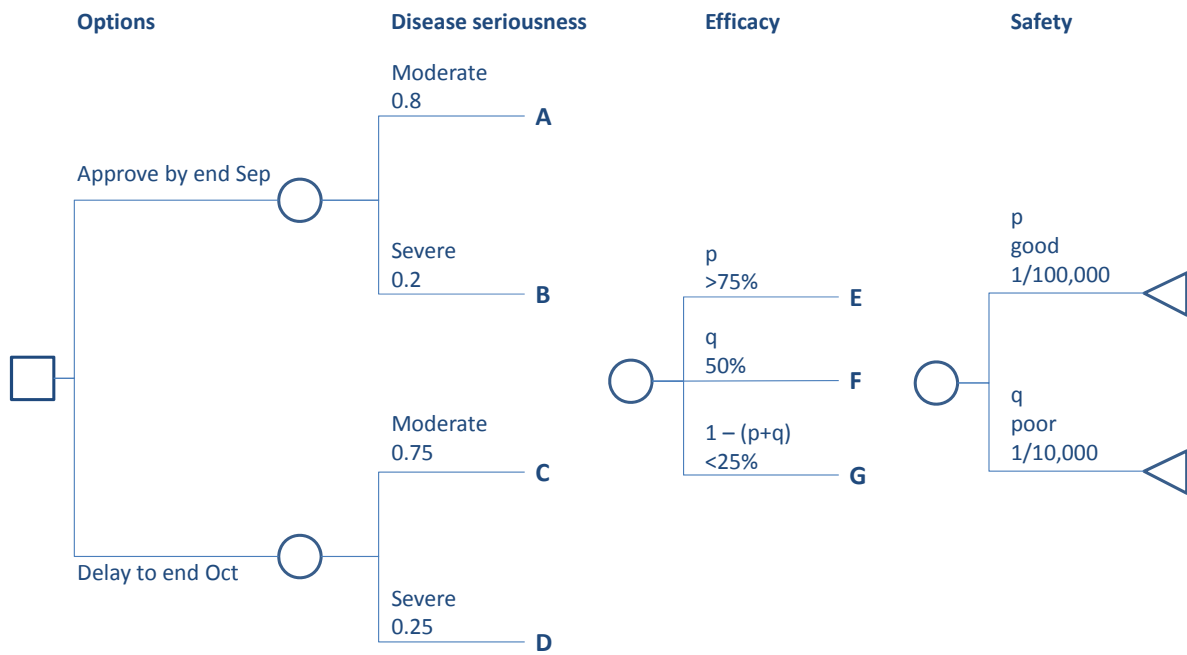

**Figure S1. Example of the decision tree for the approval of the swine influenza vaccine in 2009,** where decision of approval planning is followed by the consequences for disease seriousness. Efficacy branches attach to A through D, whereas safety branches to E through G resulting in 24 scenarios with calculable event outcomes. Based on [46].
