# Supplementary material
Source: PubMed Central journal article supplement (PMC4631171)
Supplement: bcp0080-0979-sd3.pdf [file bcp0080-0979-sd3.pdf]

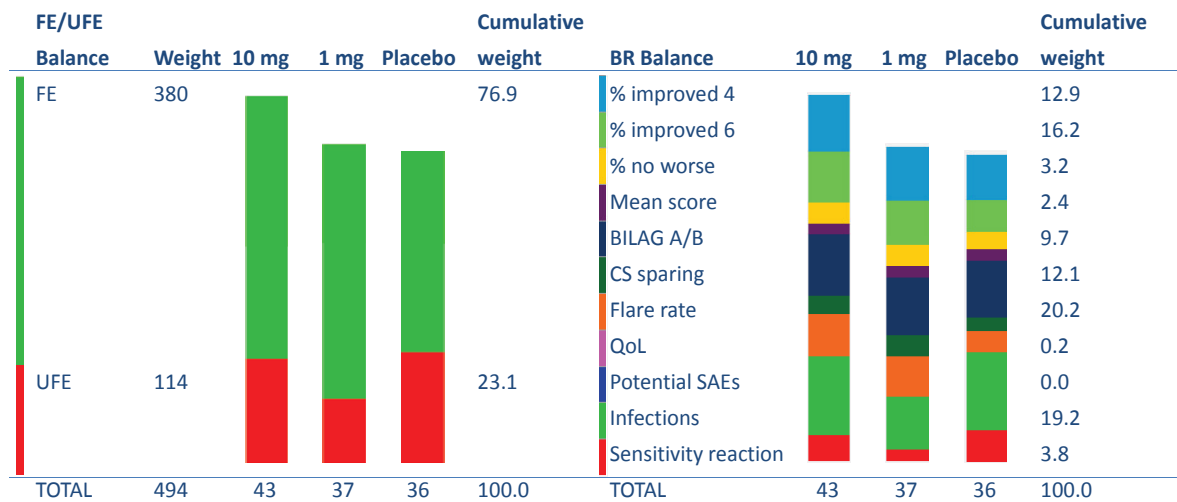

**Figure S1. Different data presentations to evaluate benefit risk balance**, in which the cumulative weight is calculated and the overall weighted scores are visualised. Left, impact of favourable effects (FE) and unfavourable effects (UFE) are shown in green and red, respectively. On the right, all different criteria are shown with their impact, which results in a more informative presentation of the data. For example, sensitivity reaction to 1mg has decreased impact as compared to placebo or 10mg. Based on [15].
