# Supplementary material
Source: PubMed Central journal article supplement (PMC4631171)
Supplement: bcp0080-0979-sd5.pdf [file bcp0080-0979-sd5.pdf]

**Table S2. Scoring of Benlysta according to different criteria, as visualised in the decision tree.** FE and UFE are favourable and unfavourable effects, respectively. SRI is SLE Response Index, SLEDAI is SLE Disease Activity Index, PGA is Physician’s Global Assessment, BILAG is British Isles Lupus Assessment Group, where A indicates severe disease and B less active disease. Secondary favourable endpoints are CS, corticosteroids, Flare rate meaning number of new BILAG A cases and QoL measured as mean change in the total score of Short Form 36. SAE are serious adverse events, such as tumour development, opportunistic infections or progressive multifocal leukoencephalopathy (PML). \* > 25% and to less than 7.5 mg/day, \*\* per patient year. Based on [50].

| Effects             | Name                 | Description                 | Best                | Worst | Units | Placebo    | 10 mg | 1 mg |      |
|---------------------|----------------------|-----------------------------|---------------------|-------|-------|------------|-------|------|------|
| <b>Favourable</b>   | SRI                  | SLEDAI                      | Improved $\geq 4$   | 100   | 0     | %          | 41    | 53   | 48   |
|                     |                      | PGA                         | No worsening        | 100   | 0     | %          | 66    | 75   | 76   |
|                     |                      | PGA                         | Mean change         | 1     | 0     | Difference | 0,44  | 0,48 | 0,45 |
|                     |                      | BILAG                       | No new A/2B         | 100   | 0     | %          | 69    | 75,2 | 70,1 |
|                     | Secondary endpoints  | CS sparing                  | Dose reduction*     | 100   | 0     | %          | 12,3  | 17,5 | 20   |
|                     |                      | Flare rate                  | New BILAG A cases** | 0     | 5     | Frequency  | 3,51  | 2,88 | 2,9  |
|                     |                      | QoL                         | Mean change SF36    | 0     | 100   | Difference | 3,5   | 3,4  | 3,7  |
| <b>Unfavourable</b> | SAE                  | Potential                   | 100                 | 0     |       | 100        | 0     | 90   |      |
|                     | Infections           | Life-threatening infections | 0                   | 10    | %     | 5,2        | 5,2   | 6,8  |      |
|                     | Sensitivity reaction | Hypersensitivity reactions  | 0                   | 2     | %     | 0,1        | 0,4   | 0,3  |      |
